# Supplementary material for: An International Survey of Aquaponics Practitioners
Source: PubMed Central journal article supplement (PMC4100909; doi:10.1371/journal.pone.0102662), 2014-07-16
Supplement: pone.0102662.s001.pdf [file pone.0102662.s001.pdf]

Supporting Information

Appendix S1. Aquaponics Survey Codebook

**Journal:** PLOS ONE

**Title:** An International Survey of Aquaponics Practitioners

**Short title:** International Survey of Aquaponics

**Authors:** David C. Love <sup>1,2</sup>, Jillian P. Fry <sup>1,2</sup>, Laura Genello <sup>1,2</sup>, Elizabeth S. Hill <sup>3</sup>, J. Adam Frederick <sup>4</sup>, Ximin Li <sup>5</sup>, Ken Semmens <sup>6</sup>

**Affiliation:**

<sup>1</sup> Johns Hopkins Center for a Livable Future, Johns Hopkins University, Baltimore, Maryland, USA

<sup>2</sup> Department of Environmental Health Sciences, Bloomberg School of Public Health, Johns Hopkins University, Baltimore, Maryland, USA

<sup>3</sup> University of Maryland Extension, Baltimore, Maryland USA

<sup>4</sup> Maryland Sea Grant College, University of Maryland College Park, Maryland, USA

<sup>5</sup> Department of Biostatistics, Bloomberg School of Public Health, Johns Hopkins University, Baltimore, Maryland, USA

<sup>6</sup> Agriculture and Natural Resources Unit, West Virginia University Extension Service, Morgantown, West Virginia, USA

**consent** Would you like to take the survey?

- Yes (1)
- Not now, email me the survey (2)
- No (3)

If “No” is selected, then skip to end of survey. If “Not now, email me the survey” is selected, then skip to email later.

.....

**emaillater** Contact Information

This information will be kept confidential and will not be released with your study responses.

- First Name (1)
- Last Name (2)
- Email (3)

.....

This survey is intended for individuals 18 years of age or older in the United States or ANY country who are engaged in aquaponics. Aquaponics is a food production system that combines aquaculture (raising fish) with hydroponics (raising plants in soilless environment).

**ever\_pract** Have you or has your organization EVER practiced aquaponics?

- Yes (1)
- No (2)

If No Is Selected, Then Skip To Enthusiast Questions

## GENERAL INFORMATION

The following questions cover general information about your aquaponics operation.

**orgcat** My survey responses will reflect WHICH of the following perspectives? SELECT ONE

- my PERSONAL activities with aquaponics (1)
- the activities of my ORGANIZATION or COMPANY (2)

**prev12op** In the previous 12 months, did you or your organization OPERATE and MAINTAIN an aquaponics system?

- Yes (1)
- No (2)

Display if prev12op=1

**hobby** In the previous 12 months, did you practice aquaponics as a HOBBY (not as your primary occupation)?

- Yes (1)
- No (2)

Display if prev12op=1

**sell\_crops** In the previous 12 months, did you or your organization SELL your aquaponics-raised FISH or CROPS?

- Yes (1)
- No (2)

Display if prev12op=1

**sell\_mater** In the previous 12 months, did you or your organization SELL aquaponics-related MATERIALS, SERVICES, or INFORMATION (e.g. consulting, design, equipment sales)?

- Yes (1)
- No (2)

**educate** In the previous 12 months, did you or your organization EDUCATE people about aquaponics (e.g. host tours, classes, courses, lectures, or workshops)?

- Yes (1)
- No (2)

Display if educate=1

**edu\_cat** Which of the following categories BEST describes your organization? SELECT THE BEST CHOICE

- K-12 Primary and Secondary School (1)
- 2-year or 4-year College or University or Graduate School (2)
- Vocational or Trade School or Technical Training Center (3)
- Commercial Producer, Vendor, or Consultant (4)
- Non-Profit Organization (e.g. after school program, faith-based organization, international aid organization, workforce training organization) (5)
- Other (88) \_\_\_\_\_

- many listed “other” and said “hobbyist/individual”

## FACILITY INFORMATION

Display if prev12op=1

The following questions cover aspects of your aquaponics system and facility. All responses will be kept confidential, and no personal or professional identifiable information will be released with reports using these data.

**first** What year did you start your FIRST aquaponics system?

Year (XXXX) (1)

**locate** Where is your aquaponics system housed? CHECK ALL THAT APPLY.

- Inside a building (1)
- Inside a greenhouse or high tunnel (2)
- On a rooftop (3)
- Outdoors (4)
- At your home (5)

**design** Who designed your aquaponics system? CHECK ALL THAT APPLY.

- Self-designed (1)
- Purchased a kit (2)
- Designed by consultants (3)

**size** Please ESTIMATE the size of your aquaponics system. For metric users, please convert units: Liters to Gallons liquid conversion calculator Meters to Feet length conversion calculator

Water volume in the aquaponics system (in gallons) (1) \_\_\_\_\_

Footprint of facility (in square feet) (2) \_\_\_\_\_

**water** What WATER SOURCES were used in the aquaponics system in the previous 12 months? CHECK ALL THAT APPLY.

- Municipal or community piped water (1)
- Groundwater or well water (2)
- Surface water (from streams, lakes, springs, or reservoirs) (3)
- Rainwater (4)
- Other (88) \_\_\_\_\_

**energy** What ENERGY SOURCES were used to operate the aquaponics system in the previous 12 months? CHECK ALL THAT APPLY.

- Electricity from the power grid (1)
- Natural gas (2)
- Propane (3)
- Compost (as a source of heat) (4)
- Geothermal (5)
- Passive solar (such as a greenhouse) (6)
- Solar thermal hot water (7)
- Solar photovoltaic cells (8)
- Wind energy (9)
- Wood-burning / pellet stove or boiler (10)
- Other (88) \_\_\_\_\_

Display if sell\_crops=1 OR sell\_mater=1

**employ** How many PEOPLE (including yourself) were EMPLOYED at your organization in the previous 12 months?

|                                                        | Number of workers (1) |
|--------------------------------------------------------|-----------------------|
| Full-time workers (150 days or more per year)<br>(1)   | _____                 |
| Part-time workers (less than 150 days per year)<br>(2) | _____                 |
| Unpaid workers, family members, volunteers<br>(3)      | _____                 |

Display if sell\_crops=1

**facilities** Please answer the following questions about your organization:

|                                                                                                                                  | Yes (1)               | No (2)                | Not applicable (98)   |
|----------------------------------------------------------------------------------------------------------------------------------|-----------------------|-----------------------|-----------------------|
| Do you or your organization own the property where the aquaponics operation is housed?<br><b>(ownproperty)</b>                   | <input type="radio"/> | <input type="radio"/> | <input type="radio"/> |
| Is supplemental lighting used for plant production?<br><b>(supplight)</b>                                                        | <input type="radio"/> | <input type="radio"/> | <input type="radio"/> |
| Is there on-site cold storage for produce? <b>(coldstore)</b>                                                                    | <input type="radio"/> | <input type="radio"/> | <input type="radio"/> |
| Is there an on-site bathroom and hand-washing station?<br><b>(onsitebath)</b>                                                    | <input type="radio"/> | <input type="radio"/> | <input type="radio"/> |
| Does your organization have a food safety plan?<br><b>(foodsafepplan)</b>                                                        | <input type="radio"/> | <input type="radio"/> | <input type="radio"/> |
| Does your organization have an aquaculture permit?<br><b>(agpermit)</b>                                                          | <input type="radio"/> | <input type="radio"/> | <input type="radio"/> |
| Does your organization breed fish in a hatchery or nursery?<br><b>(hatchery)</b>                                                 | <input type="radio"/> | <input type="radio"/> | <input type="radio"/> |
| Does your organization sell <b>other</b> agricultural products? (e.g row crops, honey, livestock, etc.)<br><b>(otherag)</b>      | <input type="radio"/> | <input type="radio"/> | <input type="radio"/> |
| Does your organization produce and sell any USDA organic certified <b>aquaponics-raised plant products?</b><br><b>(USDAcert)</b> | <input type="radio"/> | <input type="radio"/> | <input type="radio"/> |
| If <b>fish</b> could be certified USDA organic, would you be interested in pursuing this certification?<br><b>(wantUSDAcert)</b> | <input type="radio"/> | <input type="radio"/> | <input type="radio"/> |





## FISH AND CROP PRODUCTION

Display if prev12op=1

These questions cover the types of fish and crops raised in your aquaponics system.

All responses will be kept confidential, and no personal or professional identifiable information will be released with reports using these data.

**fish\_type** What types of FISH were raised at your aquaponics facility in the previous 12 months?  
CHECK ALL THAT APPLY.

- Tilapia (1)
- Catfish (2)
- Bluegill (3)
- Perch (4)
- Ornamental fish (Koi, Goldfish, Tropical fish) (5)
- Bass (6)
- Trout (7)
- Other (88) \_\_\_\_\_

Display if prev12op=1 AND sell\_crops=1

**fish\_harv** Please ESTIMATE your aquaponics FISH HARVEST in the previous 12 months at your facility. *For metric users, please convert units to pounds: Kilograms to Pounds conversion calculator*

- None (1)
- 1 - 49 pounds (2)
- 50 - 99 pounds (3)
- 100 - 499 pounds (4)
- 500 - 999 pounds (5)
- 1,000 - 4,999 pounds (6)
- 5,000 - 9,999 pounds (7)
- 10,000 pounds or greater (8)

**crop\_type** What types of CROPS were raised at your aquaponics facility in the previous 12 months? CHECK ALL THAT APPLY.

- Beans and Peas (1)
- Cucumbers (2)
- Melons (3)
- Okra (4)
- Peppers (5)
- Squash (6)
- Strawberries (7)
- Tomatoes (8)
- Basil (9)
- Bok choy (10)
- Collard greens (11)
- Head lettuce (12)
- Herbs (13)
- Kale (14)
- Salad greens (15)
- Watercress (16)
- Beets (17)
- Carrots (18)
- Onions (19)
- Cut flowers (20)
- Ornamental plants (21)
- Taro (22) -- not listed but added due to overwhelming response in “other” category
- Other fruit (23) - not listed but added due to overwhelming response in “other” category
- Corn (24) - not listed but added due to overwhelming response in “other” category

- Eggplants (25)- not listed but added due to overwhelming response in “other” category
- Other rooting crops (26) - not listed but added due to overwhelming response in “other” category
- Gourds and melons (27) - not listed but added due to overwhelming response in “other” category
- Duckweed (28) - not listed but added due to overwhelming response in “other” category
- Leeks (29) not listed but added due to overwhelming response in “other” category
- Celery (30) not listed but added due to overwhelming response in “other” category
- Chard (31)
- Broccoli (32)
- Cabbage (33)
- Cauliflower (34)
- Other (88) \_\_\_\_\_

Display if prev12op=1 AND sell\_crops=1

**plant\_harv** Please ESTIMATE your aquaponics CROP HARVEST in the previous 12 months at your facility. *For metric users, please convert units to pounds: Kilograms to Pounds conversion calculator*

- None (1)
- 1 - 49 pounds (2)
- 50 - 99 pounds (3)
- 100 - 499 pounds (4)
- 500 - 999 pounds (5)
- 1,000 - 4,999 pounds (6)
- 5,000 - 9,999 pounds (7)
- 10,000 - 49,999 pounds (8)
- 50,000 - 99,999 pounds (9)
- 100,000 pounds or greater (10)

**fish\_feed** What types of FISH FEED were used in the previous 12 months? CHECK ALL THAT APPLY.

- Feed pellets (dry fish feed) (1)
- Aquatic plants (duckweed, azolla, etc.) (2)
- Live feed (insect larvae, black soldier flies, earthworms, etc.) (3)
- Food scraps (4)
- Other (88) \_\_\_\_\_

**crop\_meth** Which of the following CROP PRODUCTION METHODS were used in the previous 12 months? CHECK ALL THAT APPLY.

- Rafts (planting in floating trays) (1)
- Media Beds (gravel or other media filled boxes) (2)
- Nutrient Thin Film (horizontal irrigated trays or gutter planters) (3)
- Vertical Towers (vertical irrigated pipe planters) (4)
- Wicking Beds (5) – not part of the survey but added due to the high response rate in “other”
- Irrigation and Dutch Buckets (6) – not part of the survey but added due to the high response rate in “other”
- Other (88) \_\_\_\_\_

## EDUCATIONAL ACTIVITIES USING AQUAPONICS

Display if educate=1

The following questions are specific to activities around aquaponics and education. All responses will be kept confidential, and no personal or professional identifiable information will be released with reports using these data.

**tours** In the past 12 months, ESTIMATE how many individuals have taken part in TOURS, CLASSES, COURSES, or WORKSHOPS at your aquaponics facility or classroom?

- None (1)
- 1 - 24 (2)
- 25 - 49 (3)
- 50 - 99 (4)
- 100 - 499 (5)
- 500 - 999 (6)
- 1,000 - 4,999 (7)
- 5,000 or greater (8)

**edusubject** What SUBJECTS do you TEACH that incorporate aquaponics? CHECK ALL THAT APPLY.

- Agriculture (1)
- Aquaculture (2)
- Biology (3)
- Chemistry (4)
- Earth Science (5)
- Engineering (6)
- Environmental Science (7)
- Food Systems (8)
- Horticulture (9)
- Math (10)
- Marine Science (11)
- Physics (12)
- Public Health (13)
- Vocational Technology (14)
- Aquaponics (as a stand-alone subject) (15)
- Permaculture (16) – not part of the survey but added due to the high response rate in
- Hydroponics (17) – not part of the survey but added due to the high response rate in
- Sustainability (18) – not part of the survey but added due to the high response rate in
- Other (88) \_\_\_\_\_

**edu\_target** Which GROUPS do you target in your education or outreach activities? CHECK ALL THAT APPLY.

- 5th grade and younger (1)
- 6th - 8th grade (2)
- 9th - 10th grade (3)
- 11th - 12th grade (4)
- Vocational or trade school or training center (5)
- 2-year college or community college (6)
- 4-year college or university (7)
- Graduate school (8)
- Working-age adults (9)
- Retired adults (10)
- All ages (11)

Display if edu\_cat=1, 2 or 3

**edu\_matrix** Please answer the following questions about aquaponics in your EDUCATION SYSTEM.

|                                                                                              | Yes (1)               | No (2)                | Not Applicable (98)   |
|----------------------------------------------------------------------------------------------|-----------------------|-----------------------|-----------------------|
| Is aquaponics integrated in your curriculum? (1)                                             | <input type="radio"/> | <input type="radio"/> | <input type="radio"/> |
| Are there courses where aquaponics is used for instruction? (2)                              | <input type="radio"/> | <input type="radio"/> | <input type="radio"/> |
| Do your students have opportunities to conduct self-guided aquaponics research projects? (3) | <input type="radio"/> | <input type="radio"/> | <input type="radio"/> |
| Does aquaponics have support from the leadership of your organization? (4)                   | <input type="radio"/> | <input type="radio"/> | <input type="radio"/> |
|                                                                                              | <input type="radio"/> | <input type="radio"/> | <input type="radio"/> |



## AQUAPONICS SALES AND PROFITABILITY

Display if sell\_crop=1 OR sell\_mater=1

The following questions are specific to organizations or individuals that sell agricultural products.

All responses will be kept confidential, and no personal or professional identifiable information will be released with reports using these data.

Display if sell\_crops=1

**outlets** To which OUTLETS did your organization sell aquaponics-raised food to in the previous 12 months? CHECK ALL THAT APPLY.

|                                                                                                | Crops (2)                | Fish (1)                 |
|------------------------------------------------------------------------------------------------|--------------------------|--------------------------|
| At your farm or facility<br>( <b>farmo</b> )                                                   | <input type="checkbox"/> | <input type="checkbox"/> |
| Road-side stand<br>( <b>roadsideo</b> )                                                        | <input type="checkbox"/> | <input type="checkbox"/> |
| Farmers market<br>( <b>fmarketo</b> )                                                          | <input type="checkbox"/> | <input type="checkbox"/> |
| Community supported<br>agriculture (CSA)<br>( <b>CSAo</b> )                                    | <input type="checkbox"/> | <input type="checkbox"/> |
| Restaurants<br>( <b>restauranto</b> )                                                          | <input type="checkbox"/> | <input type="checkbox"/> |
| Grocery stores<br>( <b>groceryo</b> )                                                          | <input type="checkbox"/> | <input type="checkbox"/> |
| Institutional buyers (schools,<br>hospitals, corporations, etc.)<br>( <b>instituteo</b> )      | <input type="checkbox"/> | <input type="checkbox"/> |
| Wholesale distributor, live<br>hauler, brokers<br>( <b>wholesaleo</b> )                        | <input type="checkbox"/> | <input type="checkbox"/> |
| To other producers (sale of<br>juvenile fish, plant starts, etc.)<br>( <b>otherproducero</b> ) | <input type="checkbox"/> | <input type="checkbox"/> |
| Other ( <b>88outlet</b> )                                                                      | <input type="checkbox"/> | <input type="checkbox"/> |

**personinc** Was an aquaponics-related job your PRIMARY source of income in the PREVIOUS 12 months?

- Yes (1)
- No (2)
- Prefer not to disclose (98)

**profitable** Please respond to the following questions about the economic sustainability of your business:

|                                                                                                                      | Yes (1)               | No (2)                | Prefer not to disclose (98) |
|----------------------------------------------------------------------------------------------------------------------|-----------------------|-----------------------|-----------------------------|
| Was the aquaponics portion of your business PROFITABLE in the PREVIOUS 12 months?<br><b>(prev12profit)</b>           | <input type="radio"/> | <input type="radio"/> | <input type="radio"/>       |
| Will the aquaponics portion of your business be PROFITABLE in the NEXT 12 months?<br><b>(next12profit)</b>           | <input type="radio"/> | <input type="radio"/> | <input type="radio"/>       |
| Will the aquaponics portion of your business be PROFITABLE in the NEXT 36 months (3 years)?<br><b>(next36profit)</b> | <input type="radio"/> | <input type="radio"/> | <input type="radio"/>       |

**sales** Please ESTIMATE your or your organization's AQUAPONICS-RELATED GROSS SALES REVENUE in the previous 12 months? (Gross sales revenue includes the sale of plants, fish, consulting fees, equipment sales, speaking fees, etc.) For international respondents, please convert units to US Dollars: [Currency Conversion Calculator](#)

- None (1)
- \$1 - \$499 USD (2)
- \$500 - \$999 USD (3)
- \$1,000 - \$4,999 USD (4)
- \$5,000 - \$9,999 USD (5)
- \$10,000 - \$49,999 USD (6)
- \$50,000 - \$99,999 USD (7)
- \$100,000 - \$499,999 USD (8)
- \$500,000 USD or greater (9)
- Prefer not to disclose (98)

## FUNDING AND INVESTMENTS IN AQUAPONICS

Display if prev12op=1 OR sell\_mater=1 OR educate=1

These questions address the financial inputs into your aquaponics facility. All responses will be kept confidential, and no personal or professional identifiable information will be released with reports using these data.

**fundsource** What SOURCES of money supported your aquaponics operation in the previous 12 months? CHECK ALL THAT APPLY

- Income from fish or crop sales (1)
- Income from aquaponics supplies, equipment, or materials sales (2)
- Income from aquaponics workshops, classes, tours, or public speaking fees (3)
- Income from aquaponics consulting, design, or construction fees (4)
- Government funding or grants (federal, state, or local) (5)
- Non-governmental organization gifts and grants (6)
- Private investments (7)
- Bank loans (8)
- Personal investments (9)
- Other (88) \_\_\_\_\_
- Prefer not to disclose (98)

**invest** Please ESTIMATE your or your organization's AQUAPONICS-RELATED INVESTMENTS in the previous 12 months. (investments in equipment, supplies, material or other expenses related to the aquaponics system) *For international respondents, please convert units to US Dollars: Currency Conversion Calculator*

- None (1)
- \$1 - \$499 USD (2)
- \$500 - \$999 USD (3)
- \$1,000 - \$4,999 USD (4)
- \$5,000 - \$9,999 USD (5)
- \$10,000 - \$49,999 USD (6)
- \$50,000 - \$99,999 USD (7)
- \$100,000 - \$499,999 USD (8)
- \$500,000 USD or greater (9)
- Prefer not to disclose (98)



**ideology** Are the following topics PERSONAL PRIORITIES for your work in aquaponics?

|                                                           | Strongly Disagree (1) | Disagree (2)          | Neither Agree nor Disagree (3) | Agree (4)             | Strongly Agree (5)    |
|-----------------------------------------------------------|-----------------------|-----------------------|--------------------------------|-----------------------|-----------------------|
| Growing my own food<br><b>(growfood)</b>                  | <input type="radio"/> | <input type="radio"/> | <input type="radio"/>          | <input type="radio"/> | <input type="radio"/> |
| Improving my health<br><b>(improdiet)</b>                 | <input type="radio"/> | <input type="radio"/> | <input type="radio"/>          | <input type="radio"/> | <input type="radio"/> |
| Improving the health of my community<br><b>(imprcomm)</b> | <input type="radio"/> | <input type="radio"/> | <input type="radio"/>          | <input type="radio"/> | <input type="radio"/> |
| Education and training<br><b>(education)</b>              | <input type="radio"/> | <input type="radio"/> | <input type="radio"/>          | <input type="radio"/> | <input type="radio"/> |
| Financial gain, making money<br><b>(money)</b>            | <input type="radio"/> | <input type="radio"/> | <input type="radio"/>          | <input type="radio"/> | <input type="radio"/> |
| Faith-based work <b>(faith)</b>                           | <input type="radio"/> | <input type="radio"/> | <input type="radio"/>          | <input type="radio"/> | <input type="radio"/> |
| International aid and development<br><b>(aid)</b>         | <input type="radio"/> | <input type="radio"/> | <input type="radio"/>          | <input type="radio"/> | <input type="radio"/> |
| Environmental sustainability<br><b>(env)</b>              | <input type="radio"/> | <input type="radio"/> | <input type="radio"/>          | <input type="radio"/> | <input type="radio"/> |
| Adapting to climate change<br><b>(climate)</b>            | <input type="radio"/> | <input type="radio"/> | <input type="radio"/>          | <input type="radio"/> | <input type="radio"/> |

**knowledge** Do you agree or disagree with the following statements:

|                                                                                    | Strongly Disagree (1) | Disagree (2)          | Neither Agree nor Disagree (3) | Agree (4)             | Strongly Agree (5)    |
|------------------------------------------------------------------------------------|-----------------------|-----------------------|--------------------------------|-----------------------|-----------------------|
| I know how to modify the pH of an aquaponics system<br><b>(knowpH)</b>             | <input type="radio"/> | <input type="radio"/> | <input type="radio"/>          | <input type="radio"/> | <input type="radio"/> |
| I know how to diagnose FISH diseases<br><b>(knowfishd)</b>                         | <input type="radio"/> | <input type="radio"/> | <input type="radio"/>          | <input type="radio"/> | <input type="radio"/> |
| I know how to diagnose PLANT nutrient deficiencies<br><b>(knowplantnut)</b>        | <input type="radio"/> | <input type="radio"/> | <input type="radio"/>          | <input type="radio"/> | <input type="radio"/> |
| I know how to repair plumbing if something breaks<br><b>(knowplumb)</b>            | <input type="radio"/> | <input type="radio"/> | <input type="radio"/>          | <input type="radio"/> | <input type="radio"/> |
| I know how to track FISH growth rates<br><b>(knowfishgrow)</b>                     | <input type="radio"/> | <input type="radio"/> | <input type="radio"/>          | <input type="radio"/> | <input type="radio"/> |
| I know how to manage PLANT pests effectively<br><b>(knowplantpests)</b>            | <input type="radio"/> | <input type="radio"/> | <input type="radio"/>          | <input type="radio"/> | <input type="radio"/> |
| I know the regulations for processing and selling FISH<br><b>(knowsellfishreg)</b> | <input type="radio"/> | <input type="radio"/> | <input type="radio"/>          | <input type="radio"/> | <input type="radio"/> |



**resources** What RESOURCES do you use to troubleshoot or solve problems? CHECK ALL THAT APPLY.

- Contact other growers (i.e., aquaponics, hydroponics, or traditional farmers) (1)
- Online websites, YouTube, internet community forums (2)
- Print resources (books, magazines, other publications) (3)
- Seminars or workshops (4)
- University staff / agriculture extension (5)
- State government agencies (i.e., state fisheries or natural resources agencies) (6)
- Federal government agencies (USDA, NOAA, etc) (7)
- Other (88) \_\_\_\_\_

## DEMOGRAPHIC INFORMATION

All responses will be kept confidential, and no personal or professional identifiable information will be released with reports using these data.

Display if orgcat=2

**orglocate** Where is your aquaponics system located?

City (3)

State, Province, or District (4)

Zip or Postal code (5)

Country (6)

Name of Organization (7)

Display if orgcat=1

**location** Where is your aquaponics system located?

City (1)

State, Province or District (2)

Zip or Postal Code (3)

Country (4)

**roleinorg** What is your role in the organization? CHECK ALL THAT APPLY.

- Owner or Operator (1)
- CEO (2)
- Executive Director (3)
- School Official (4)
- Farm Manager (5)
- Educator (6)
- Employee (7)
- Consultant (8)
- Volunteer (9)
- Other (88) \_\_\_\_\_

**gender** What is your gender?

- Male (1)
- Female (2)
- Do not wish to specify (98)

**edu\_level** What is your highest level of education?

- Less than High School (1)
- High School or GED (2)
- Some college (3)
- College degree (e.g.: BA, BS) (4)
- Masters degree (e.g.: MBA, MAT, MPH) (5)
- Doctorate degree (e.g.: PhD, JD, MD, DVM) (6)

**age** What is your age in years? \_\_\_\_\_

**finding** Would you like to be contacted when the survey findings are released?

- Yes (1)
- No (2)

**next\_study** May we contact you by e-mail for future studies?

- Yes (1)
- No (2)

**prize** Would you like to be entered into the lottery to win one of four \$75 gift certificates to Amazon.com?

- Yes (1)
- No (2)

**name\_email** Contact Information This information will be kept confidential and will not be released with your study responses.

First name (1)

Last Name (2)

Email (3)

**com\_box** Do you have any additional comments? \_\_\_\_\_

## QUESTIONS FOR ENTHUSIASTS

Display if ever\_pract=2

**interest** What aspects of aquaponics are you MOST interested in? Check all that apply.

- Growing my own food (1)
- Environmental sustainability (2)
- Commercial production (3)
- Education and training (4)

**enthage** What is your age in years? \_\_\_\_\_

**enthulocat** Where are you located?

City (1)

State, Province, or District (2)

Zip or Postal code (3)

Country (4)

**follow-up** Would you like to be contacted when the survey findings are released?

- Yes (1)
- No (2)

**futurefoll** May we contact you by e-mail for future studies?

- Yes (1)
- No (2)

**contact** Contact Information

This information will be kept confidential and will not be released with your study responses.

First Name (1)

Last Name (2)

Email (3)

**comments** Do you have any additional comments? \_\_\_\_\_

We thank you for completing the survey.  
Your response has been recorded. For any questions or comments  
about the survey please contact Dave Love (dlove@jhsph.edu).

You can help us track growth and interest in aquaponics.  
Please share this survey link with your friends and colleagues:

[www.jhsph.edu/clf/survey\\_aquaponics.html](http://www.jhsph.edu/clf/survey_aquaponics.html)
