# Supplementary material for: An International Survey of Aquaponics Practitioners
Source: PubMed Central journal article supplement (PMC4100909; doi:10.1371/journal.pone.0102662), 2014-07-16
Supplement: pone.0102662.s002.pdf [file pone.0102662.s002.pdf]

## Supporting Information

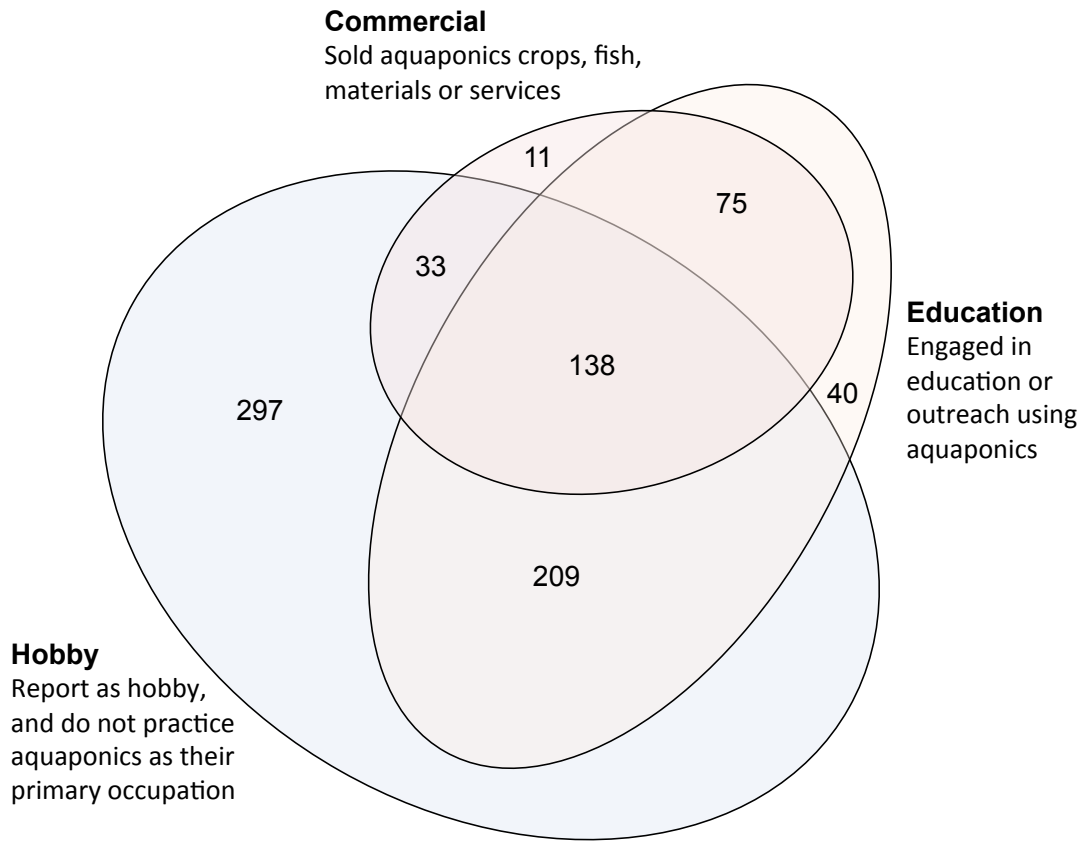

Figure S2. Venn diagram of respondents' backgrounds and experiences in aquaponics in the previous 12 months. The survey was open from June to October 2013. The Venn diagram was constructed using software eulerAPE v.3 [1], and population sample size is reported inside the ovals.

### References:

1. Rodgers P, Micallef L (2013) eulerAPE v.3.
